# Supplementary material for: CAR-Modified Vγ9Vδ2 T Cells Propagated Using a Novel Bisphosphonate Prodrug for Allogeneic Adoptive Immunotherapy
Source: Preprints.org preprint supplement (doi:10.20944/preprints202305.1853.v1), 2023-05-26

Figure S1

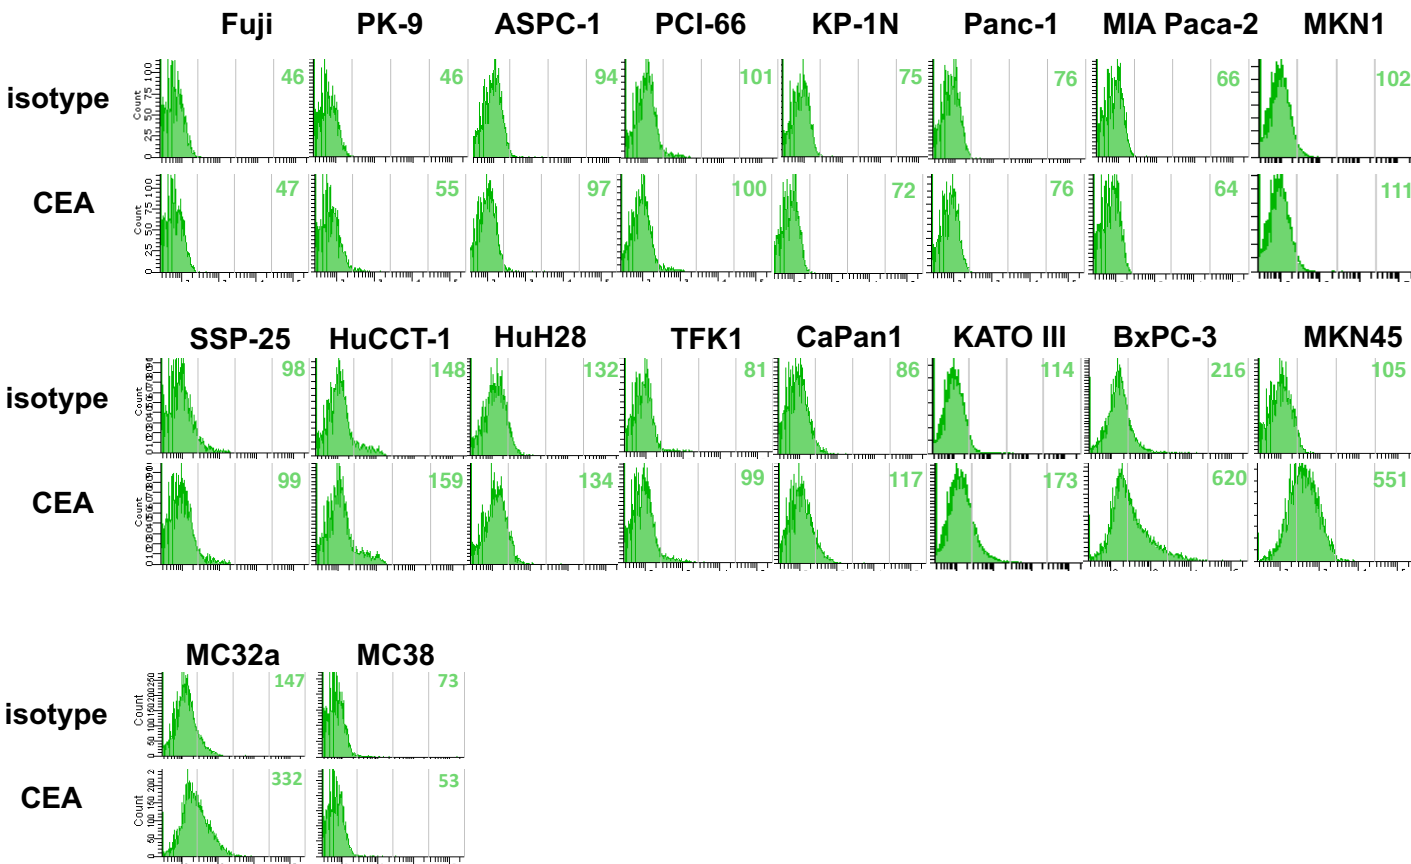

# Figure S2

**A**

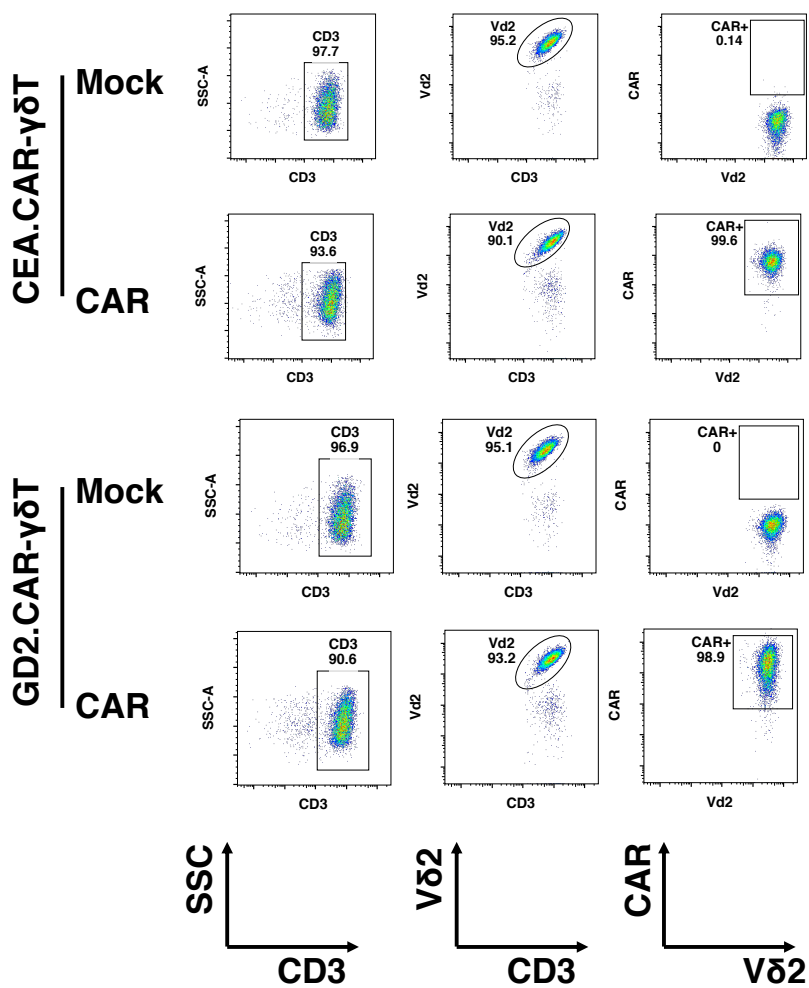

**B**

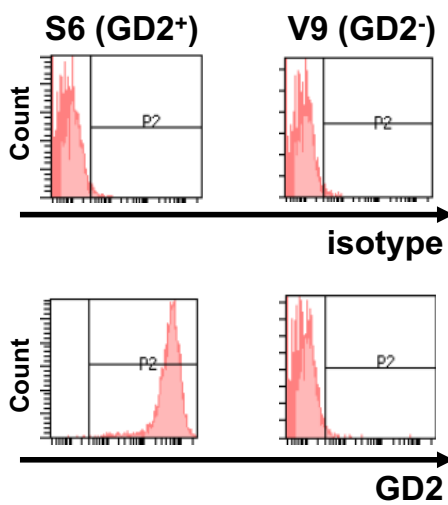

**C**

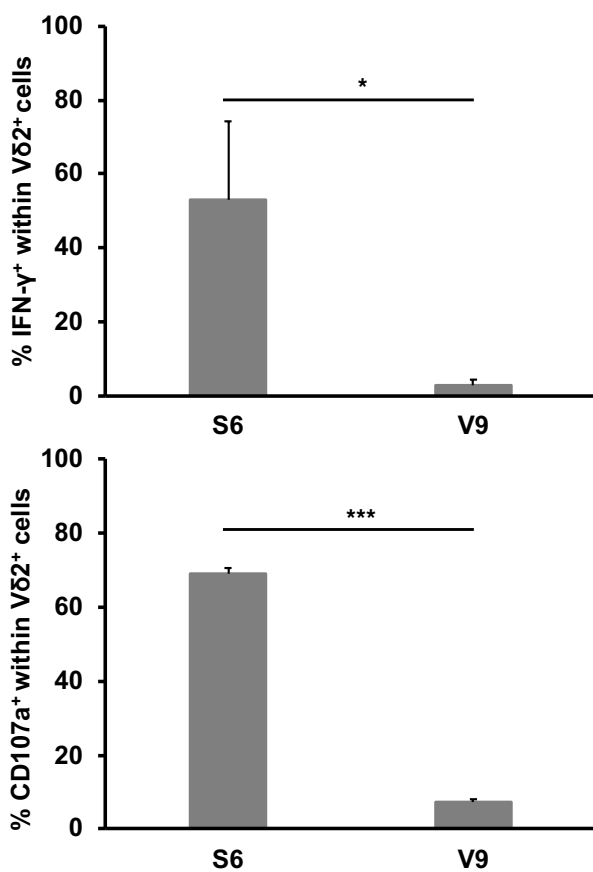

# Figure S3

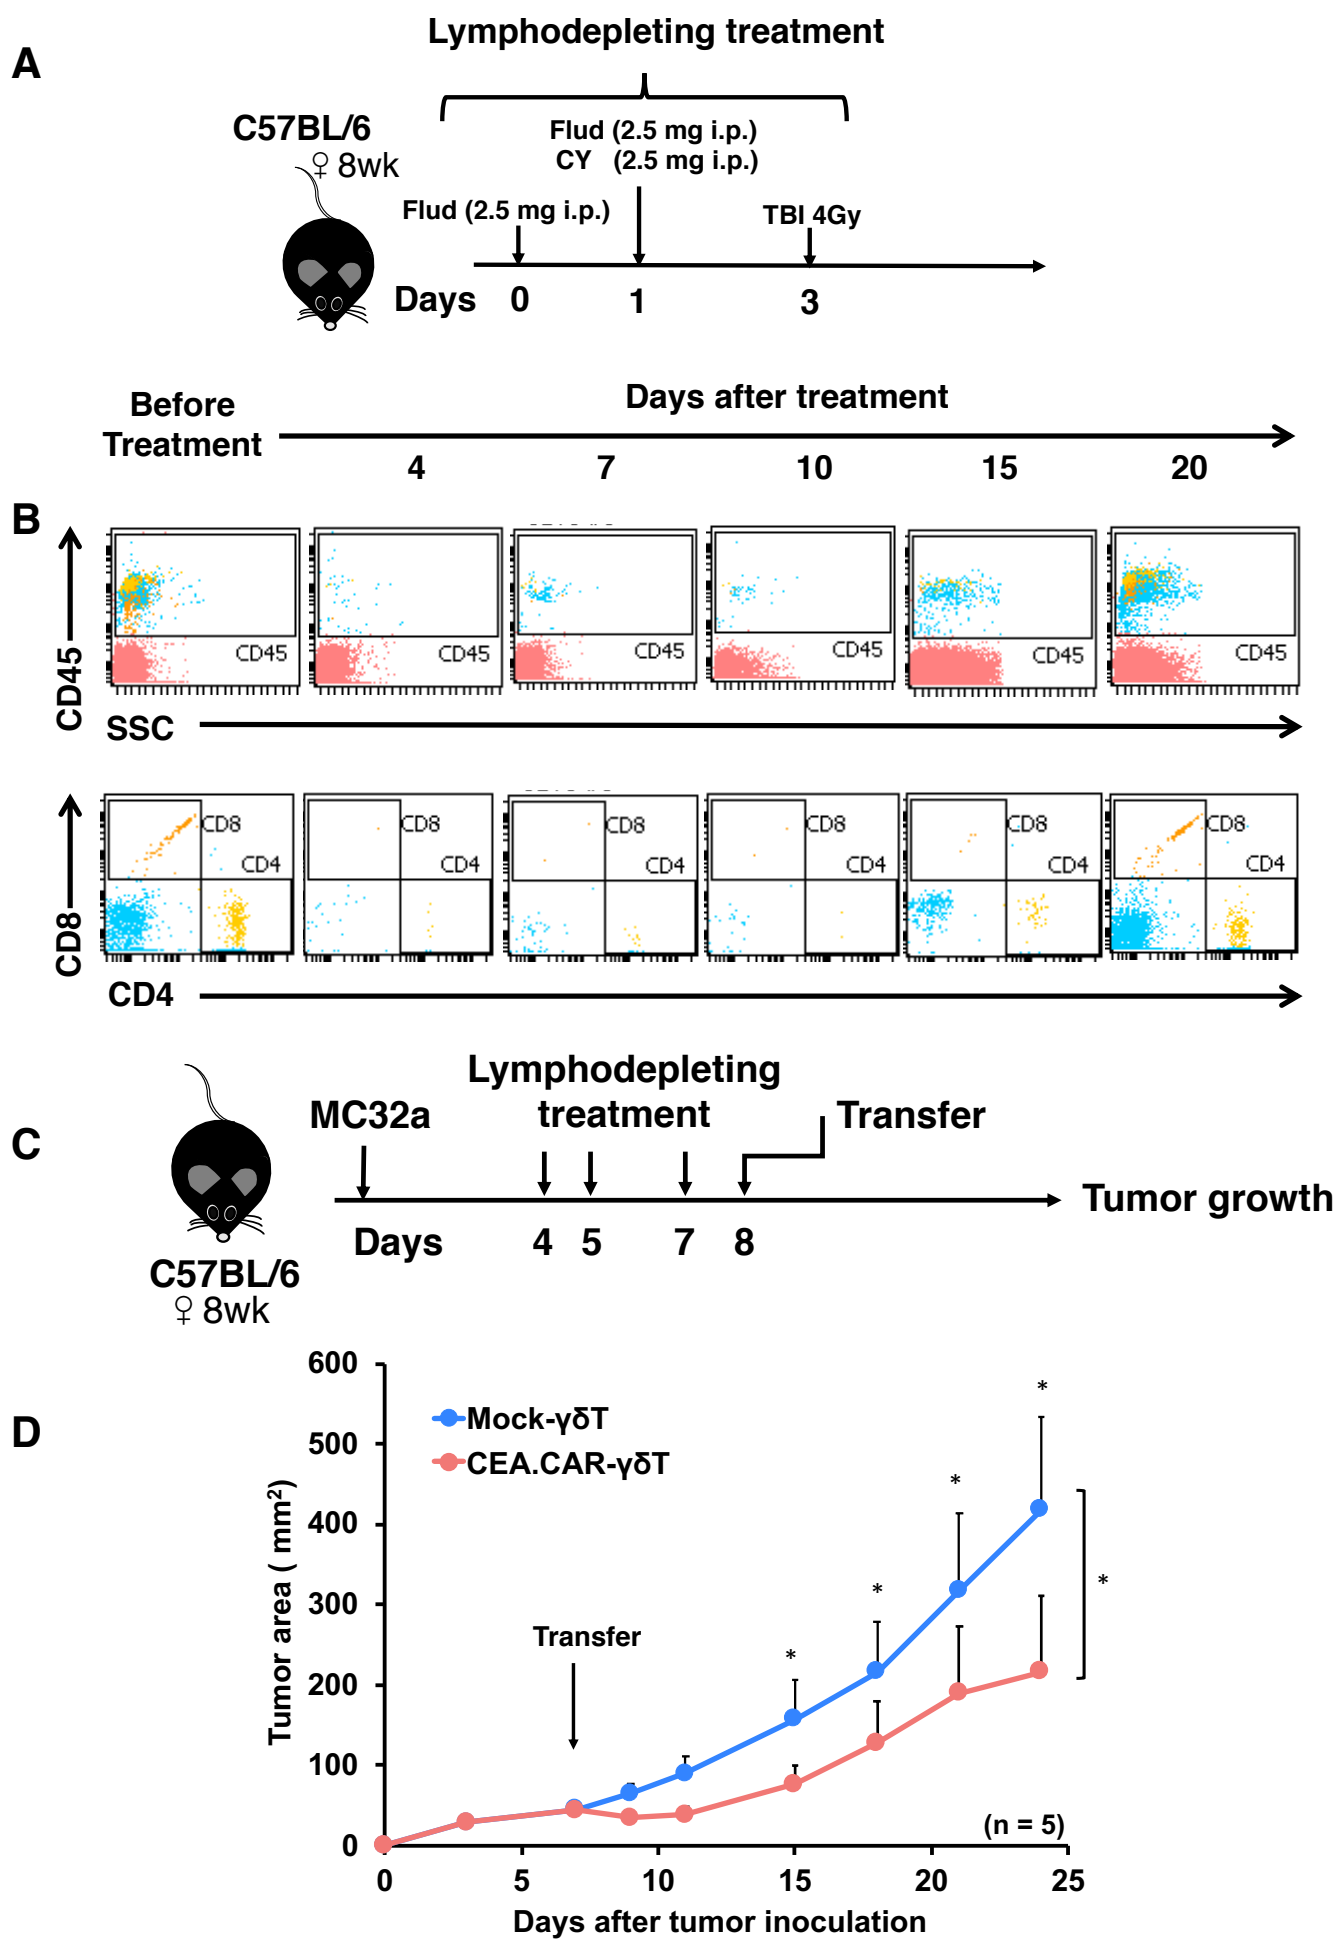

# Figure S4

**A**

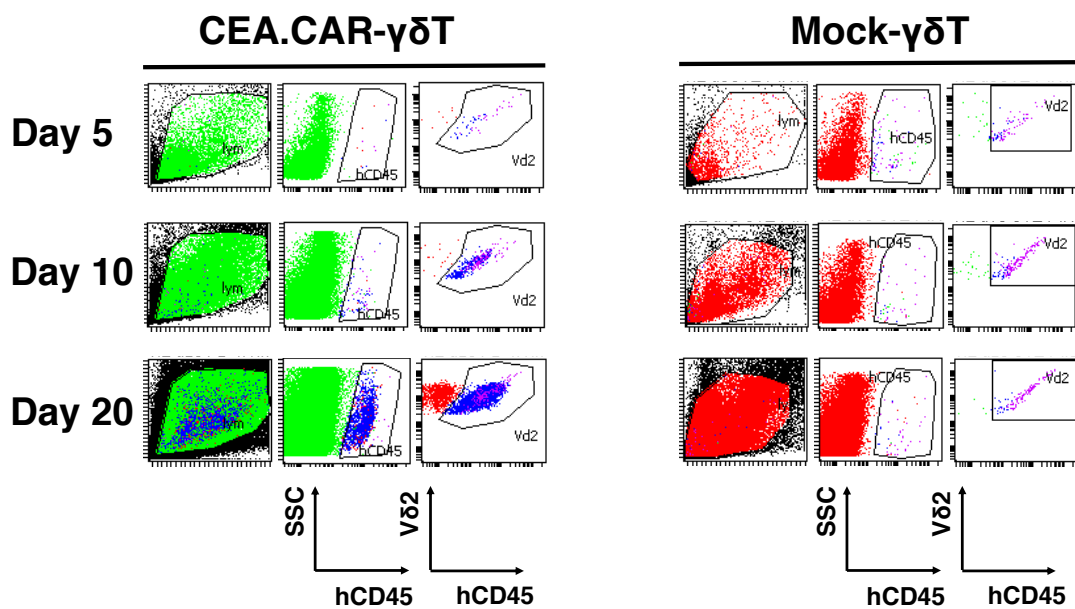

**B**

**PBS** **Mock- $\gamma\delta$ T** **CEA.CAR- $\gamma\delta$ T** **GD2.CAR- $\gamma\delta$ T**

**Mouse #1**

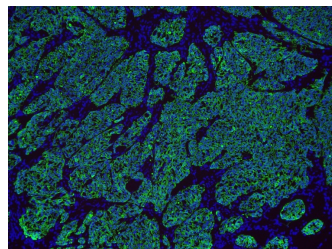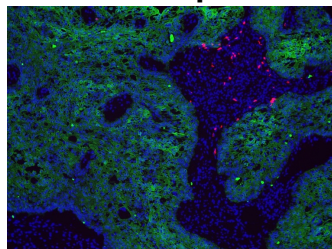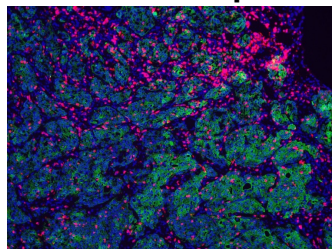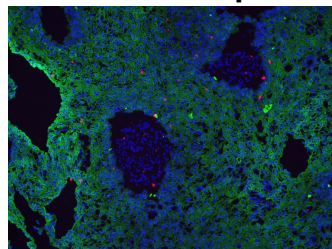

**Mouse #2**

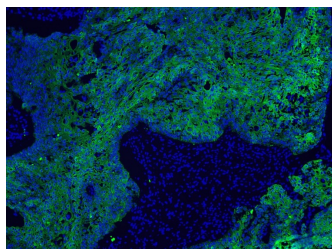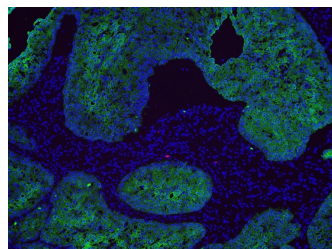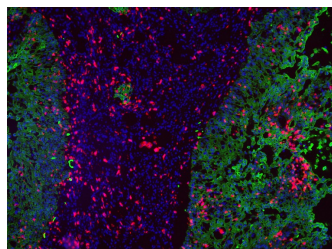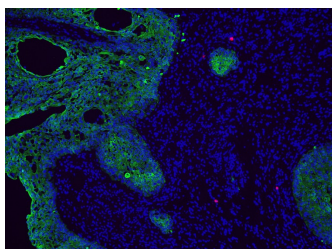

**hCD45 Cytokeratin DAPI (n = 2)**

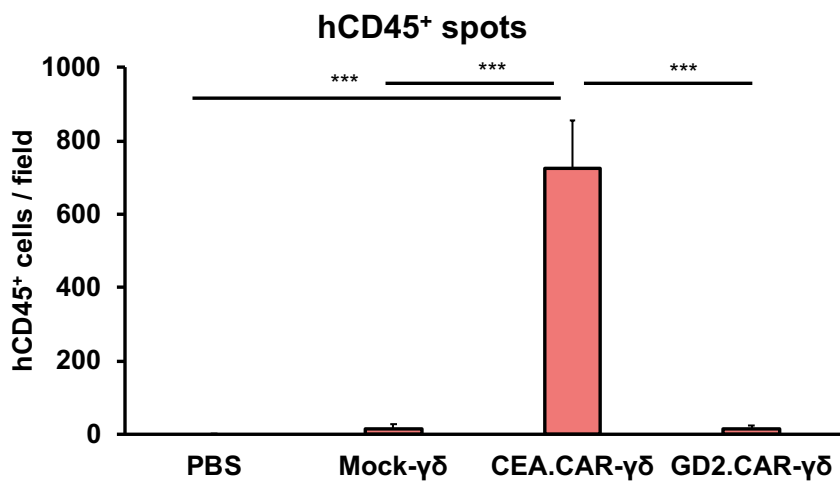

Figure S5

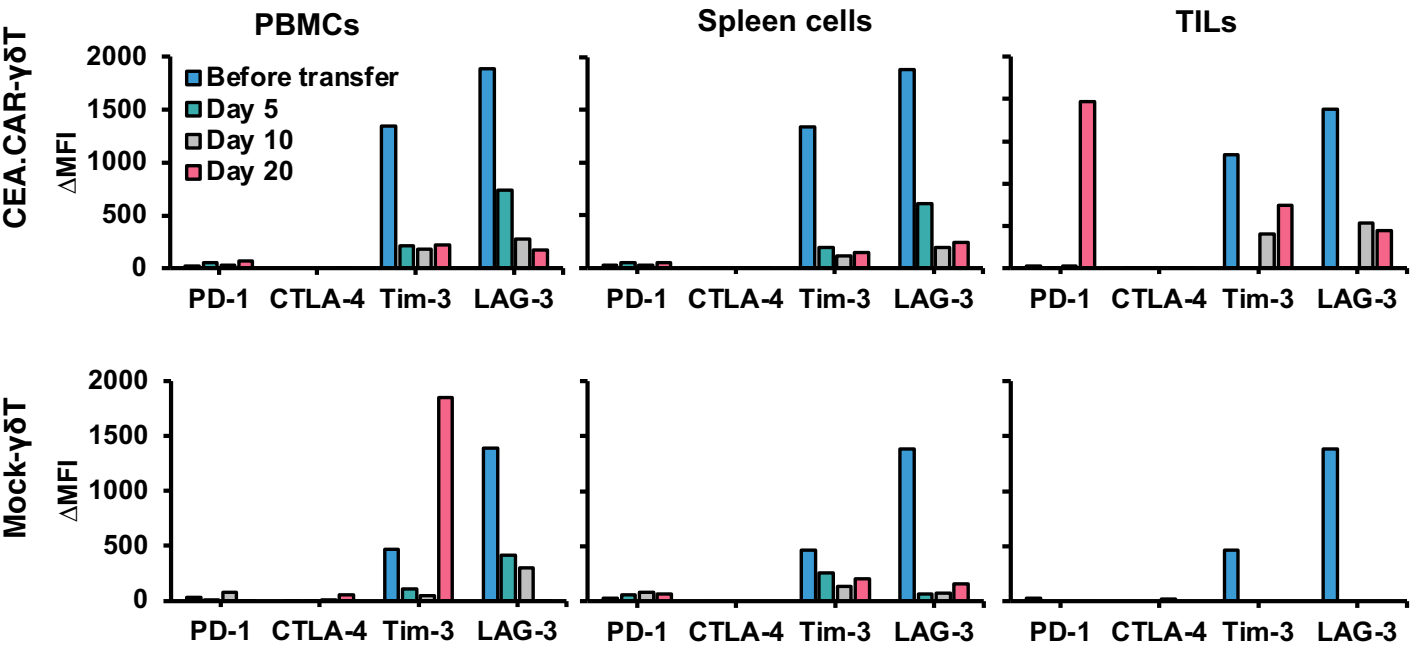

# Figure S6

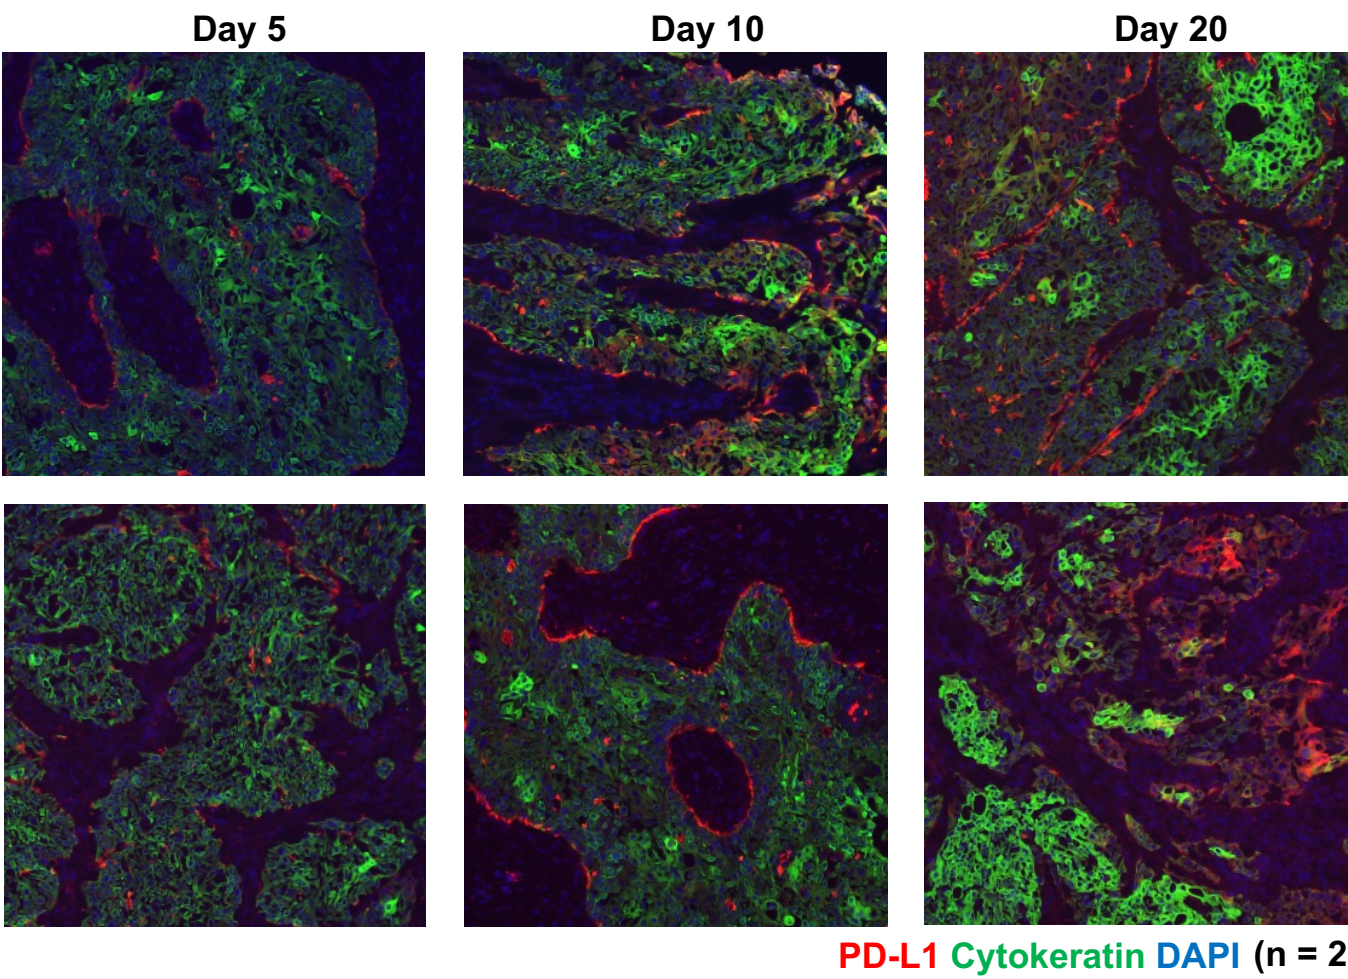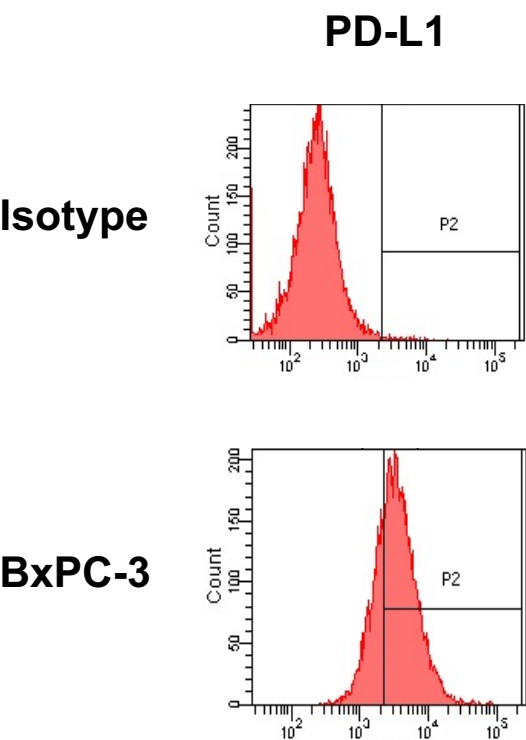

Figure S7

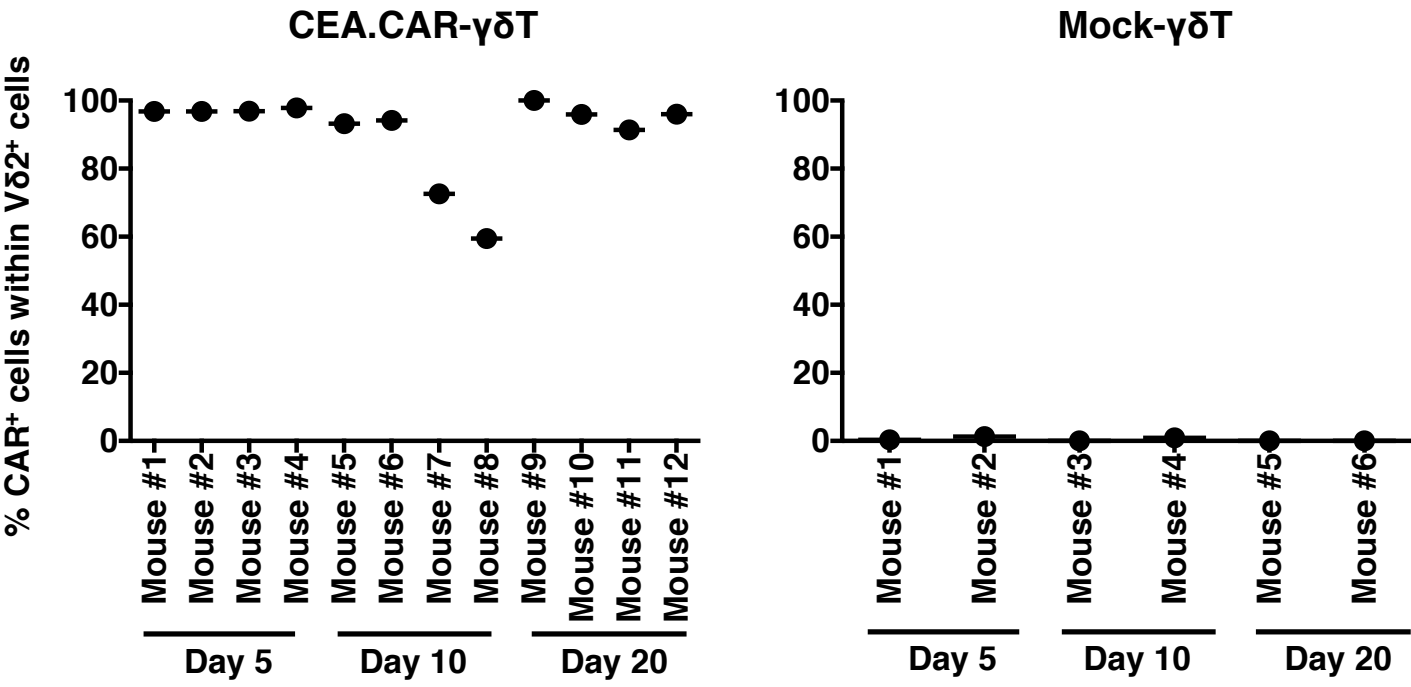

# Figure S8

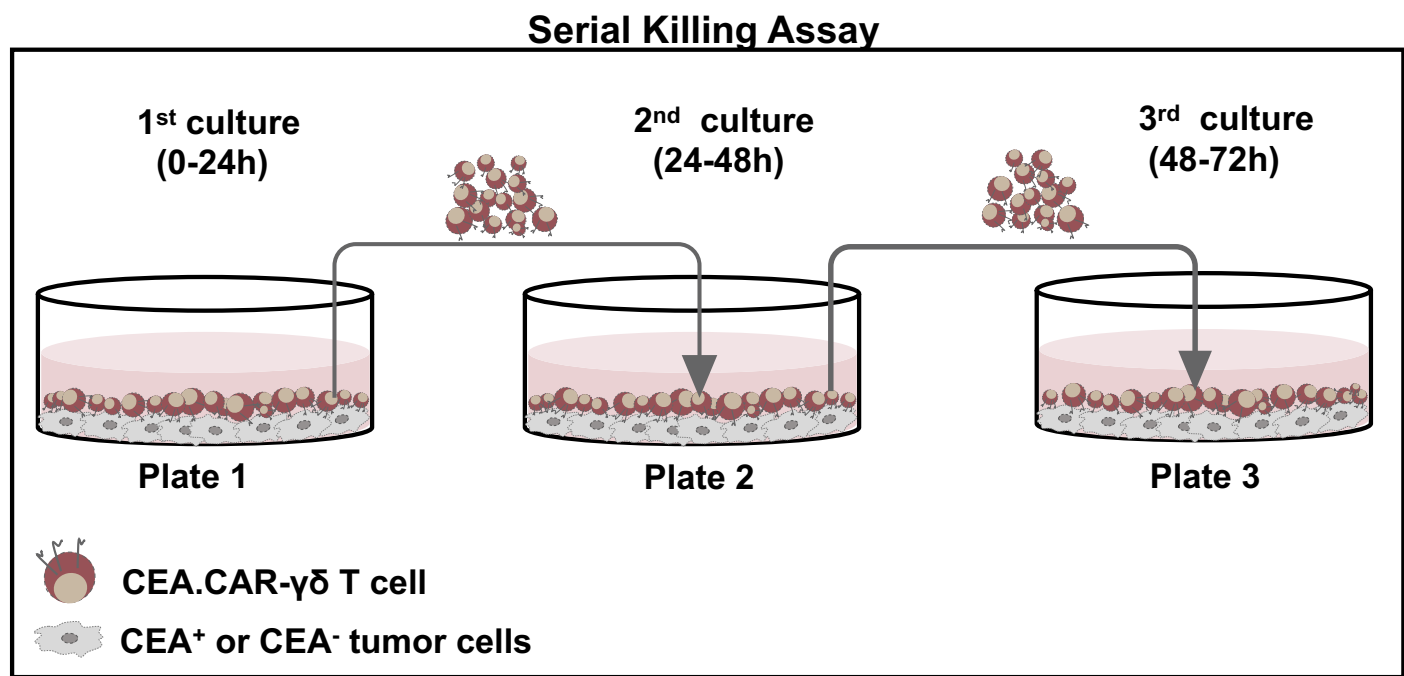

Supplement: Supplementary file 1 [file supplementary]
